# Supplementary material for: Stem cell-derived cranial and spinal motor neurons reveal proteostatic differences between ALS resistant and sensitive motor neurons
Source: eLife. 2019 Jun 3;8:e44423. doi: 10.7554/eLife.44423 (PMC6594754; doi:10.7554/eLife.44423)
Supplement: Supplementary file 2. [file elife-44423-supp2.xlsx]

## Sheet: Sheet1
	List of qPCR primers
	qPCR primers	Sequence
	sXBP1 Forward	GAGTCCGCAGCAGGTG
	sXBP1 Reverse	GTGTCAGAGTCCATGGGA
	GRP78 Forward	TCATCGGACGCACTTGGAA
	GRP78 Reverse	CAACCACCTTGAATGGCAAGA
	ATF4 Forward	GGGTTCTGTCTTCCACTCCA
	ATF4 Reverse	AAGCAGCAGAGTCAGGCTTTC
	HRD1 Forward	TCAAGGGGTAGTCAAGTGGG
	HRD1 Reverse	TTTGAATGGGAGGCATTGAT
	hSOD1-HA Forward	AGATGACTTGGGCAAAGG
	hSOD1-HA Reverse	TGGAACATCGTATGGGTATC
	β-actin Forward	TGAGAGGGAAATCGTGCGTGACAT
	β-actin Reverse	ACCGCTCGTTGCCAATAGTGATGA
	RPL19 Forward	ATGCCAACTCCCGTCAGCAG
	RPL19 Reverse	TTCATCCTTCTCATCCAGGTCACC
